# Supplementary material
Source: Royal Society of Chemistry journal article supplement (doi:10.1039/d6gc01210h)
Supplement: d6gc01210h1.pdf [file d6gc01210h1.pdf]

# **Efficient and Selective Recovery of Spent NCM Cathode Materials: A Green Deep Eutectic Solvent Process via Synergistic Acidity-Viscosity Regulation**

Guangke Ye <sup>a</sup>, Guofan Zhang <sup>a,\*</sup>, Yunxia Wu<sup>a</sup>

<sup>a</sup> School of Minerals Processing and Bioengineering, Central South University,  
Changsha 410083, China

\* Corresponding author at: School of Minerals Processing and Bioengineering, Central  
South University, Changsha 410083, China.

E-mail address: zhanggf0821@163.com (G. Zhang).

Number of Pages: 12

Number of Figures: 9

Number of Tables: 8

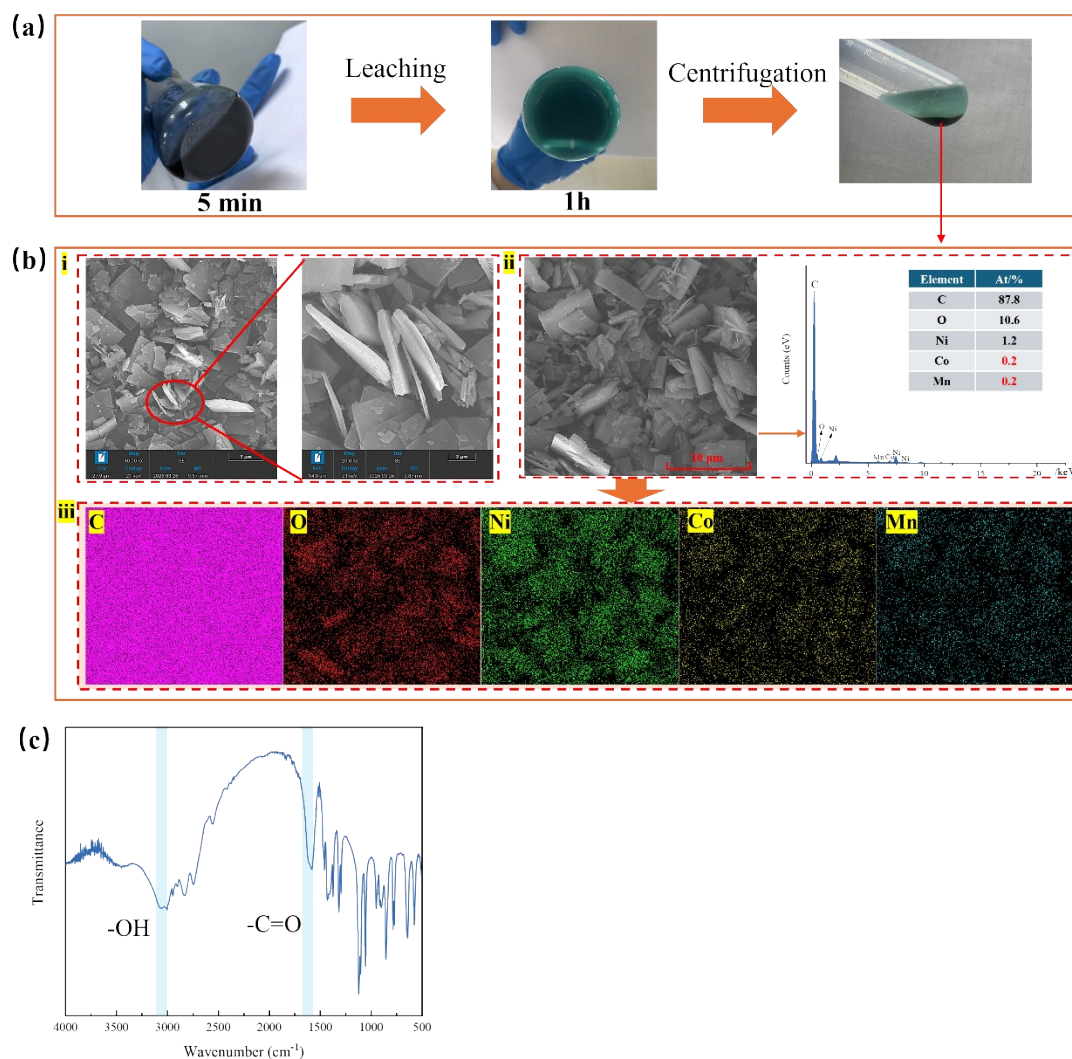

Figure S1. Characterization of the solid residue obtained after leaching at 140 °C for 1 h: (a) Photographs of the leachate at 5 min and 1 h, and the leachate at 1 h after centrifugation; (b) SEM image and EDS elemental mapping of the precipitate; (c) FTIR spectrum of the precipitate.

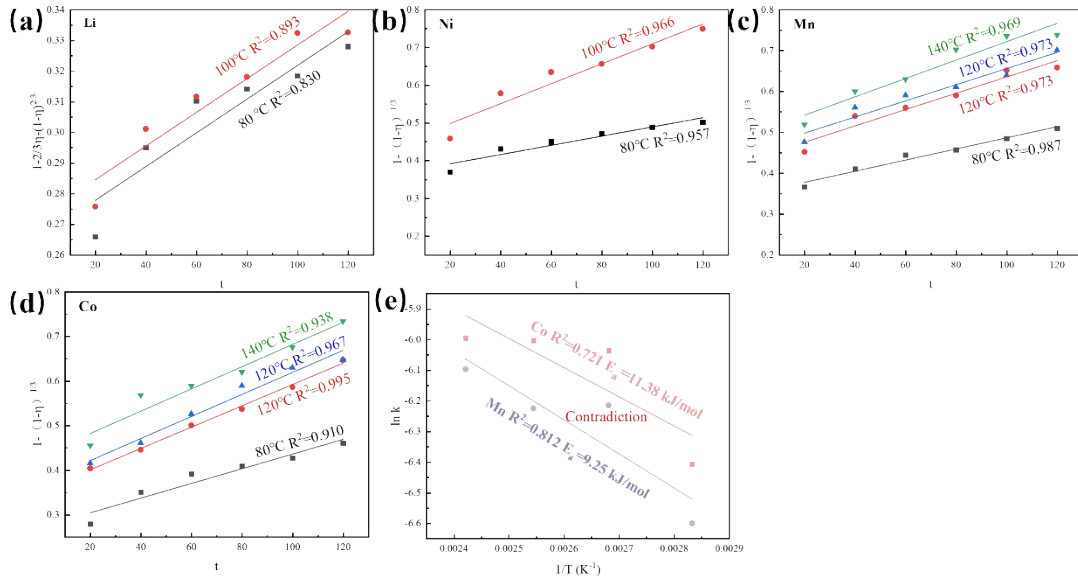

Figure S2. Leaching kinetics based on the shrinking core model (ash-layer diffusion control) for (a) Li, (b) Ni, (c) Mn, (d) Co, and their corresponding Arrhenius plots.

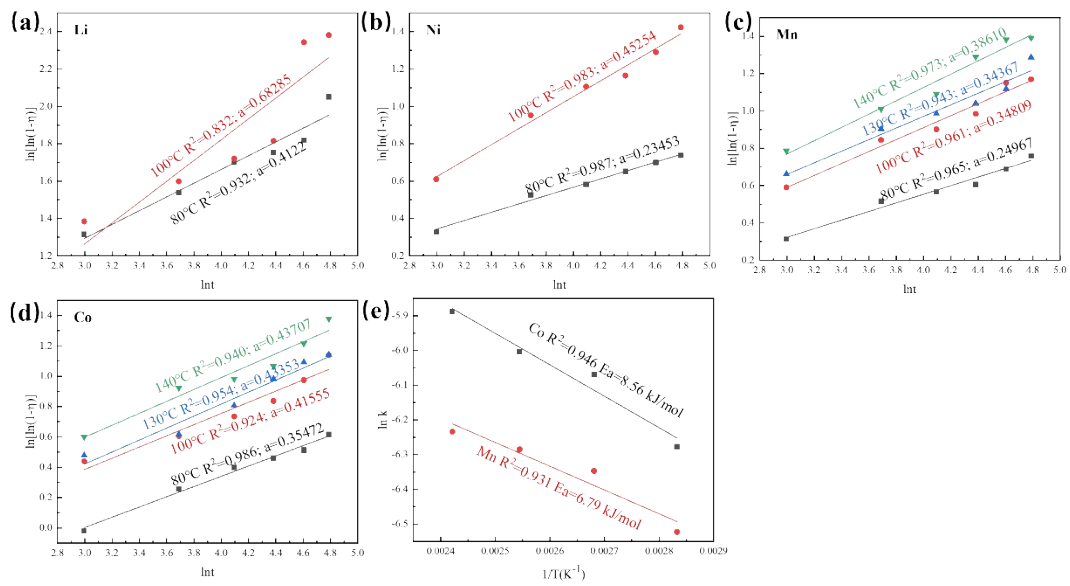

Figure S3. Leaching kinetics based on the Avrami–Erofeyev model for (a) Li, (b) Ni, (c) Mn, (d) Co, and their corresponding Arrhenius plots.

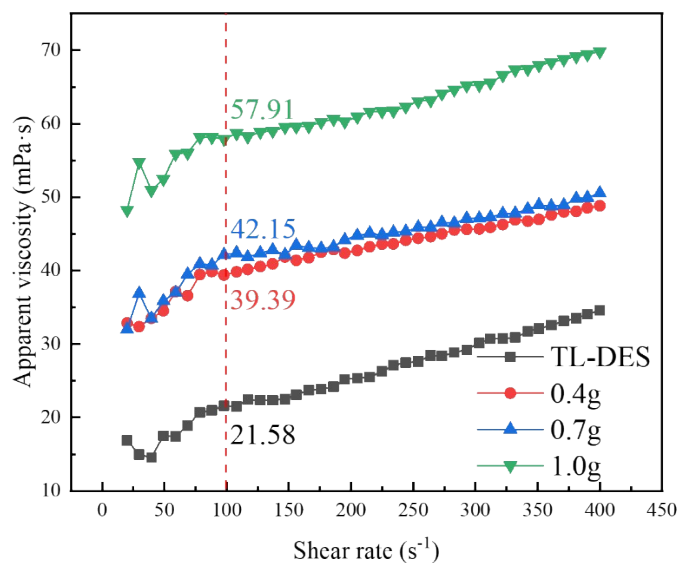

Figure S4. Viscosity of TL-DES leachate as a function of cathode material loading measured at 25 °C after leaching at 100 °C for 2 h.

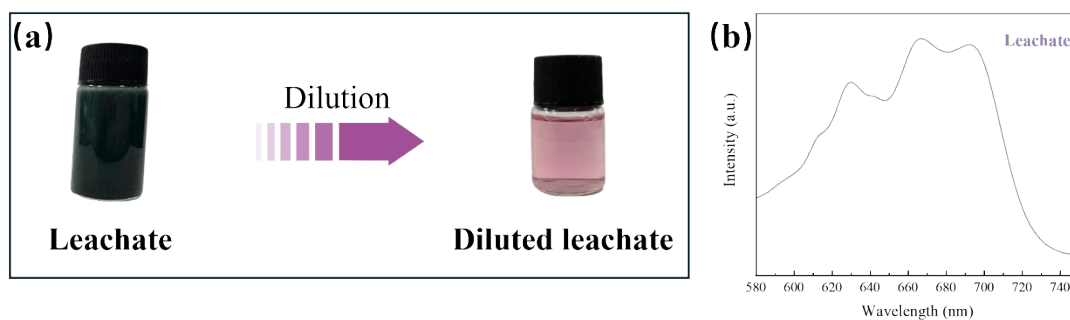

Figure S5. State and UV-Vis spectroscopic analysis of the leachate. (a) Photographic comparison of the original leachate and the diluted leachate; (b) UV-Vis absorption spectrum of the original leachate.

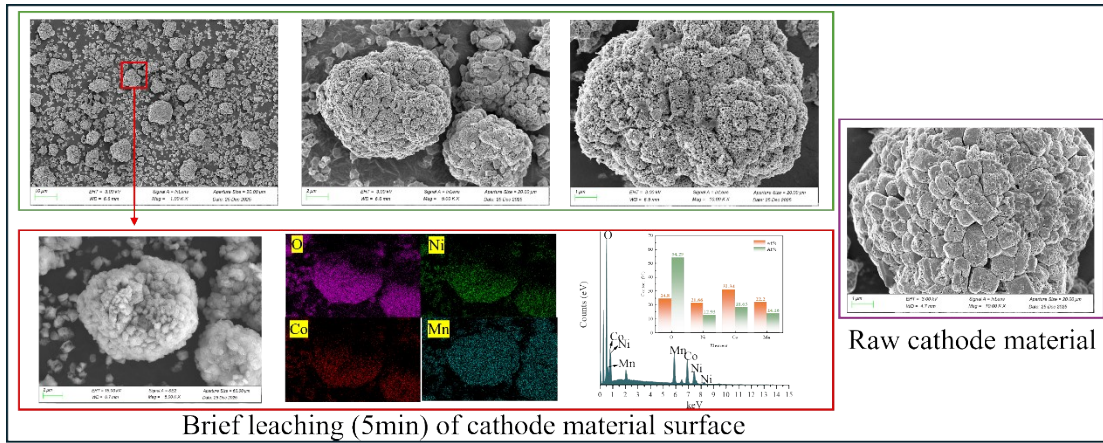

Figure S6. Different regions morphology of the cathode surface after brief leaching (5min).

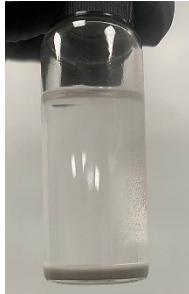

Figure S7. Immediate formation of a light pink precipitate upon the addition of ethanol to the leachate.

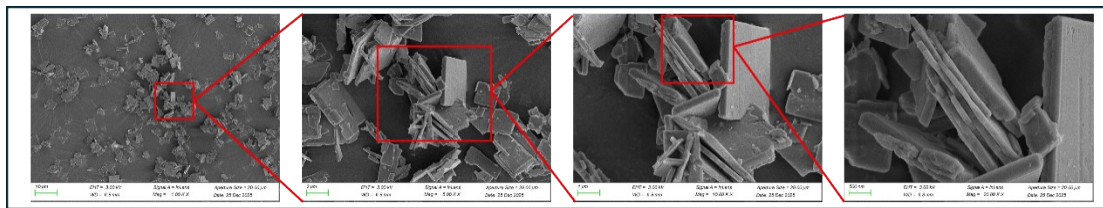

Figure S8. Different regions morphology of the precipitates.

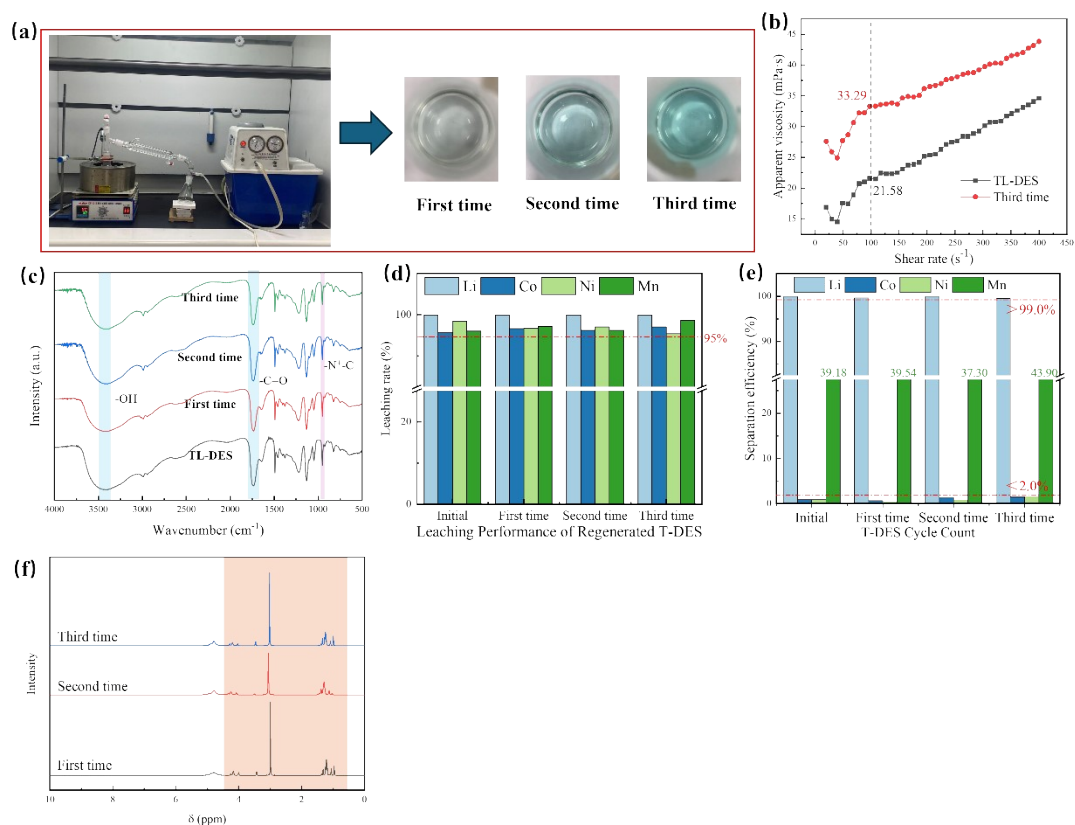

Figure S9. Recyclability study of the TL-DES system. (a) Process flowchart for DES regeneration; (b) Viscosity comparison of fresh DES and DES after three cycles; (c) FTIR spectra of fresh DES and regenerated DES; (d) Leaching efficiencies of Li, Ni, Co, and Mn over three consecutive cycles; (e) Selective separation efficiencies of metals after each cycle; (f) <sup>1</sup>H NMR spectra of fresh DES and regenerated DES.

Table S1. Elemental Analysis of NCM Raw Materials.

| Element   | Li    | Co     | Ni     | Mn     |
|-----------|-------|--------|--------|--------|
| Content/% | 4.123 | 24.544 | 25.382 | 22.930 |

Table S2. Kinetic parameters obtained from the Avrami–Erofeyev model for the leaching of Li, Ni, Mn, and Co in TL-DES at different temperatures.

| Element | Temperature<br>(°C) | R <sup>2</sup> | a     | Interpretation    |
|---------|---------------------|----------------|-------|-------------------|
| Li      | 100                 | 0.832          | 0.683 | Mixed control     |
| Li      | 80                  | 0.932          | 0.412 | Diffusion control |
| Ni      | 100                 | 0.983          | 0.453 | Diffusion control |
| Ni      | 80                  | 0.987          | 0.235 | Diffusion control |
| Mn      | 140                 | 0.973          | 0.386 | Diffusion control |
| Mn      | 130                 | 0.943          | 0.344 | Diffusion control |
| Mn      | 100                 | 0.961          | 0.348 | Diffusion control |
| Mn      | 80                  | 0.965          | 0.250 | Diffusion control |
| Co      | 140                 | 0.940          | 0.437 | Diffusion control |
| Co      | 130                 | 0.954          | 0.434 | Diffusion control |
| Co      | 100                 | 0.924          | 0.416 | Diffusion control |
| Co      | 80                  | 0.986          | 0.355 | Diffusion control |

Table S3. Ethanol recovery efficiencies over three regeneration cycles.

| Number of cycles | Anti-solvent - Ethanol |                   |                 |
|------------------|------------------------|-------------------|-----------------|
|                  | Dosage/g               | Recovery amount/g | Recovery rate/% |
| First            | 29.96                  | 28.241            | 94.262          |
| Second           | 31.12                  | 29.881            | 96.018          |
| Third            | 32.128                 | 29.554            | 91.988          |

Table S4. Costs percentage of Hydrometallurgy.

| Project                 | Percentage/% |
|-------------------------|--------------|
| Annualized capital cost | 5.40         |
| Other fixed costs       | 1.03         |
| Plant overhead          | 0.00         |
| Maintenance             | 0.92         |
| Labor                   | 0.34         |
| Other variable costs    | 1.84         |
| Utilities               | 0.46         |
| Materials               | 92.31        |

Table S5. The treatment of battery components by different recycling methods.

| Handling methods         | Pyrometallurgy  | Direct       | This work    |
|--------------------------|-----------------|--------------|--------------|
| Active cathode materials | Recycle         | Recycle      | Recycle      |
| Graphite                 | Burn for energy | Recycle      | Recycle      |
| Copper                   | Recycle         | Recycle      | Landfill     |
| Aluminum                 | Landfill        | Recycle      | Landfill     |
| Plastics                 | Burn for energy | Landfill     | Landfill     |
| Electrolyte: solvents    | Burn for energy | Intermediate | Intermediate |
| Carbon black             | Burn for energy | Recycle      | Landfill     |
| Binder                   | Burn for energy | Landfill     | Landfill     |

Table S6. Environmental impacts of different recycling methods.

|                                                        | Pyrometallurgy | Direct        | This work    |
|--------------------------------------------------------|----------------|---------------|--------------|
| <b>Energy use in MJ per kg feedstock processed</b>     |                |               |              |
| <b>Total Energy</b>                                    | <b>8.48</b>    | <b>15.638</b> | <b>7.220</b> |
| <b>Total Emissions in g per kg feedstock processed</b> |                |               |              |
| VOC                                                    | 0.091          | 0.245         | 0.129        |
| CO                                                     | 0.355          | 0.861         | 0.429        |
| NO <sub>x</sub>                                        | 0.957          | 2.220         | 1.614        |
| PM10                                                   | 0.117          | 0.287         | 0.116        |
| PM2.5                                                  | 0.066          | 0.208         | 0.094        |
| SO <sub>x</sub>                                        | 1.509          | 1.591         | 6.597        |
| BC                                                     | 0.015          | 0.035         | 0.022        |
| OC                                                     | 0.011          | 0.050         | 0.032        |
| CH <sub>4</sub>                                        | 1.026          | 2.007         | 1.005        |
| N <sub>2</sub> O                                       | 0.016          | 0.018         | 0.013        |
| CO <sub>2</sub>                                        | 2,051          | 1,223         | 484          |
| CO <sub>2</sub> (w/ C in VOC & CO)                     | 2,052          | 1,225         | 485          |
| <b>GHGs</b>                                            | <b>2,087</b>   | <b>1,290</b>  | <b>519</b>   |

Table S7. The cost in different recycling methods (\$/kg).

|                         | Pyrometallurgy | Direct | This work |
|-------------------------|----------------|--------|-----------|
| Annualized capital cost | 1.50           | 0.87   | 0.47      |
| Materials               | 6.24           | 7.86   | 8.04      |
| Labor                   | 0.03           | 0.03   | 0.03      |
| Utilities               | 0.08           | 0.02   | 0.04      |
| Maintenance             | 0.14           | 0.14   | 0.08      |
| Other variable costs    | 0.13           | 0.16   | 0.16      |
| Other fixed costs       | 0.09           | 0.09   | 0.09      |
| Total                   | 8.21           | 8.90   | 8.71      |

Table S8. The product recycling value in different recycling methods (\$/kg).

|                             | Pyrometallurgy | Direct | This work |
|-----------------------------|----------------|--------|-----------|
| Li <sup>+</sup> in product  | /              | /      | 2.06      |
| Co <sup>2+</sup> in product | 6.12           | /      | 6.19      |
| Ni <sup>2+</sup> in product | 2.04           | /      | 2.07      |
| Mn <sup>2+</sup> in product | /              | /      | 0.37      |
| Graphite                    | /              | /      | 0.06      |

---

|              |      |       |       |
|--------------|------|-------|-------|
| Copper metal | 0.07 | /     | /     |
| NCM          | /    | 12.42 | /     |
| Total        | 8.23 | 12.42 | 10.75 |

---
